# Supplementary material for: Vapor transport deposited tin monosulfide for thin-film solar cells: effect of deposition temperature and duration
Source: Royal Society of Chemistry journal article supplement (doi:10.1039/c8ta09820d), 2019-01-01
Supplement: c8ta09820d1.pdf [file c8ta09820d1.pdf]

Electronic supplementary information (ESI) for

The influence of the variation in preferred orientation of tin sulfide absorbers on the performance of thin-film solar cells

*Dajeong Lee,<sup>a#</sup> Jae Yu Cho,<sup>a#</sup> Hee-Sun Yun,<sup>bc</sup> Doh-Kwon Lee,<sup>bc</sup> Taehoon Kim,<sup>d</sup>  
Kijoon Bang,<sup>e</sup> Yun Seog Lee,<sup>df</sup> Ho-Young Kim<sup>df</sup> and Jaeyeong Heo<sup>a\*</sup>*

<sup>a</sup>Department of Materials Science and Engineering, and Optoelectronics Convergence Research Center, Chonnam National University, Gwangju 61186, Republic of Korea

<sup>b</sup>Photo-electronic Hybrids Research Center, Korea Institute of Science and Technology (KIST), Seoul 02792, Republic of Korea

<sup>c</sup>Division of Nano and Information Technology, KIST school Korea University of Science and Technology, Seoul 02792, Republic of Korea

<sup>d</sup>Department of Mechanical and Aerospace Engineering, Seoul National University, Seoul 08826, Republic of Korea

<sup>e</sup>Global Frontier Center for Multiscale Energy Systems, Seoul National University, Seoul 08826, Republic of Korea

<sup>f</sup>Institute of Engineering Research, Seoul National University, Seoul 08826, Republic of Korea

<sup>#</sup>These authors contributed equally to this work.

\*E-mail: jheo@jnu.ac.kr

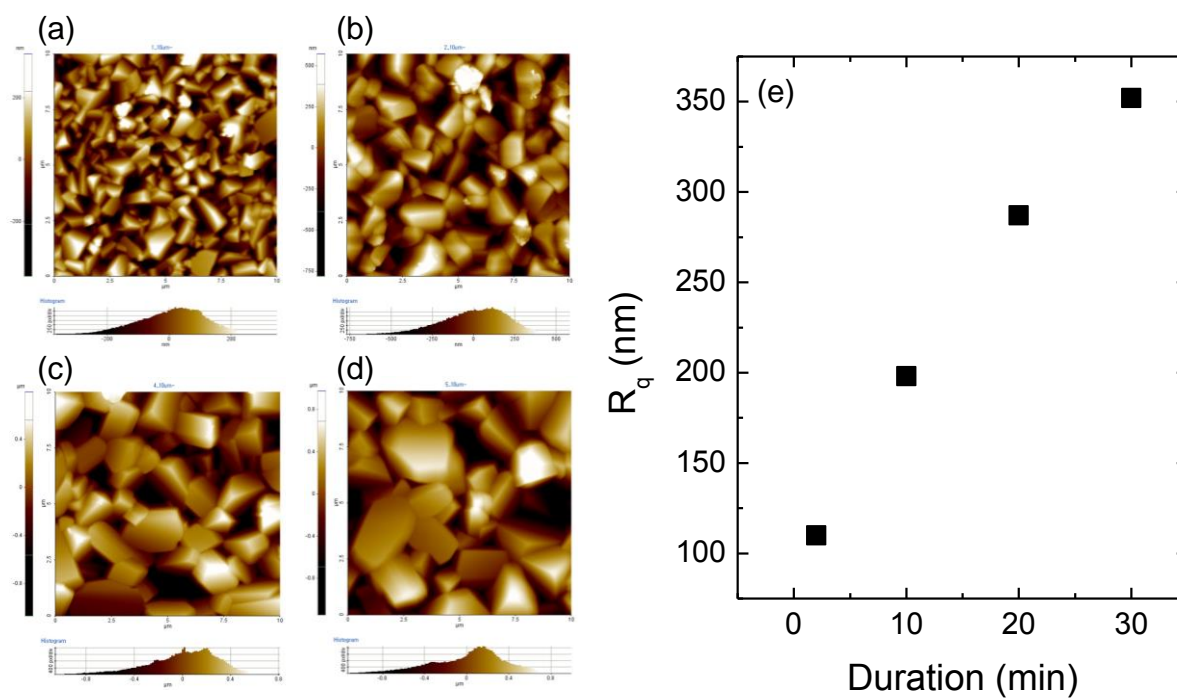

**Fig. S1** AFM images of SnS absorbers grown at various durations of (a) 2 min, (b) 10 min, (c) 20 min, and (d) 30 min. Here, the image size is  $10 \mu\text{m} \times 10 \mu\text{m}$ . (e) Root-mean-square roughness ( $R_q$ ) of SnS absorbers.

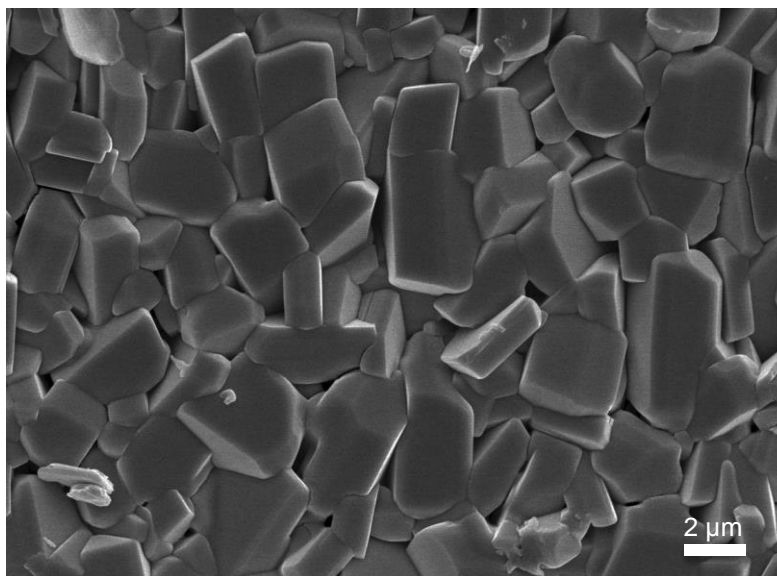

**Fig. S2** Plane-view SEM image of SnS absorber grown for 40 min.

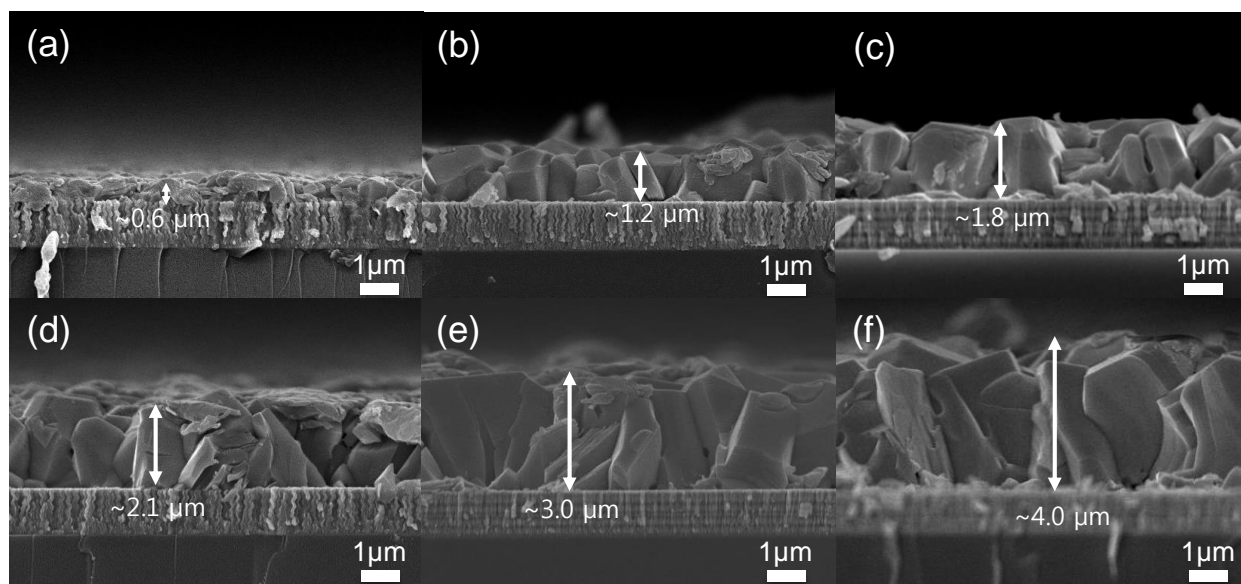

**Fig. S3** Cross-sectional SEM images of SnS grown for (a) 2 min, (b) 10 min, (c) 15 min, (d) 20 min, (e) 30 min, and (f) 40 min, respectively.

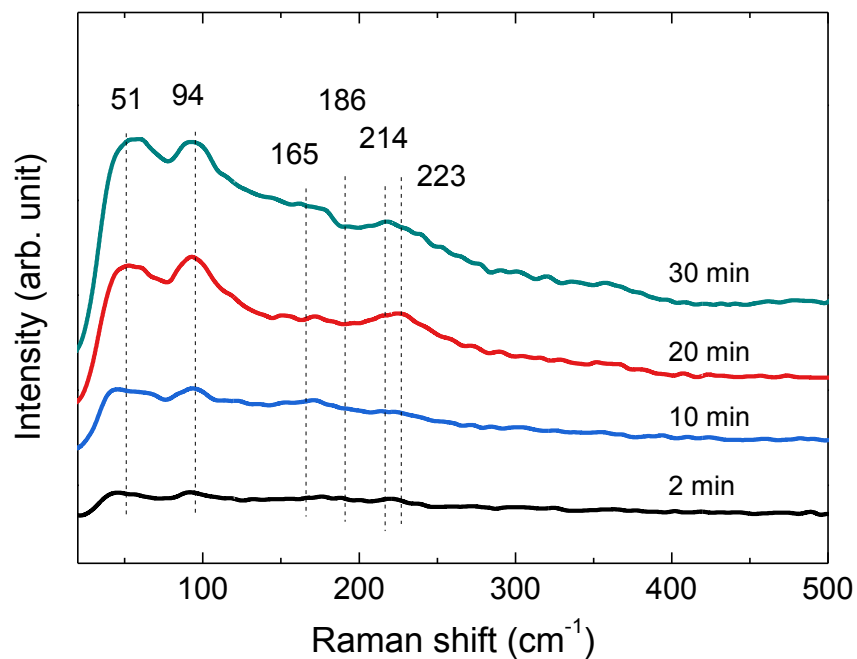

**Fig. S4** Raman spectra for the SnS absorbers at different growth durations from 2 to 30 min.

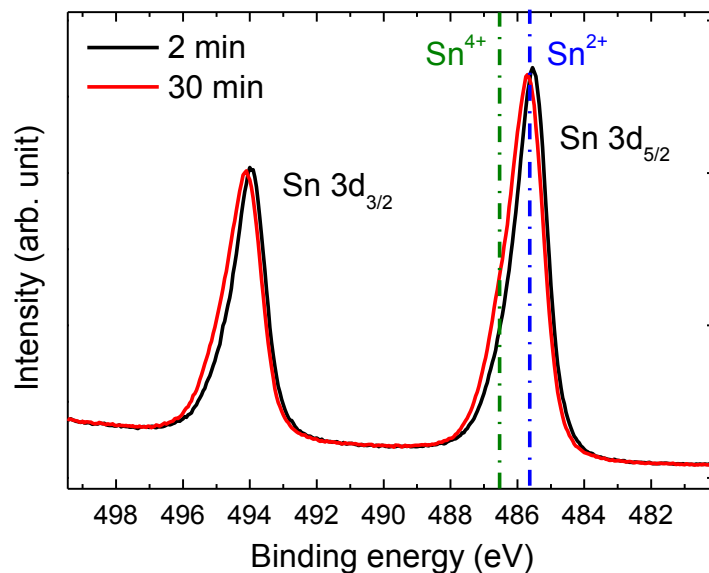

**Fig. S5** XPS Sn 3d spectra for SnS absorbers grown for 2 min and for 30 min after surface Ar<sup>+</sup> cleaning. Binding energy of 485.6 and 486.5 eV correspond to Sn<sup>2+</sup> and Sn<sup>4+</sup>, respectively.<sup>R1</sup> Chemical state of Sn for both films is mainly Sn<sup>2+</sup>.

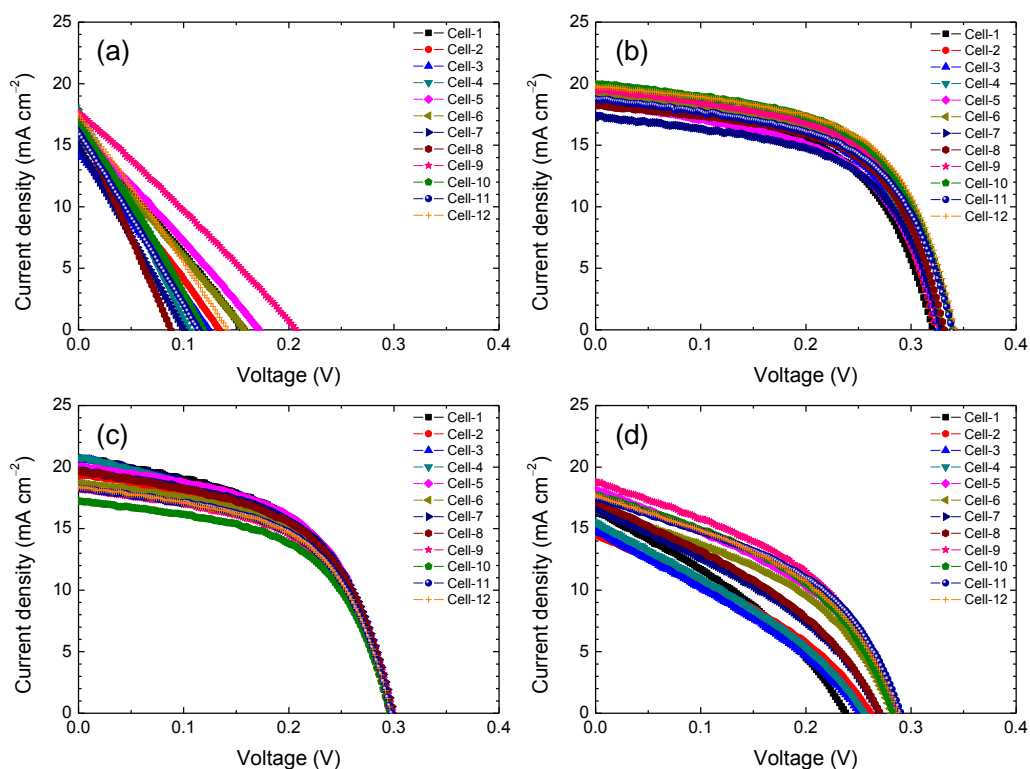

**Fig. S6** All the  $J$ - $V$  characteristics of the four SnS TFSC samples containing 12 cells each with different growth durations of (a) 2 min, (b) 10 min, (c) 20 min, and (d) 30 min.

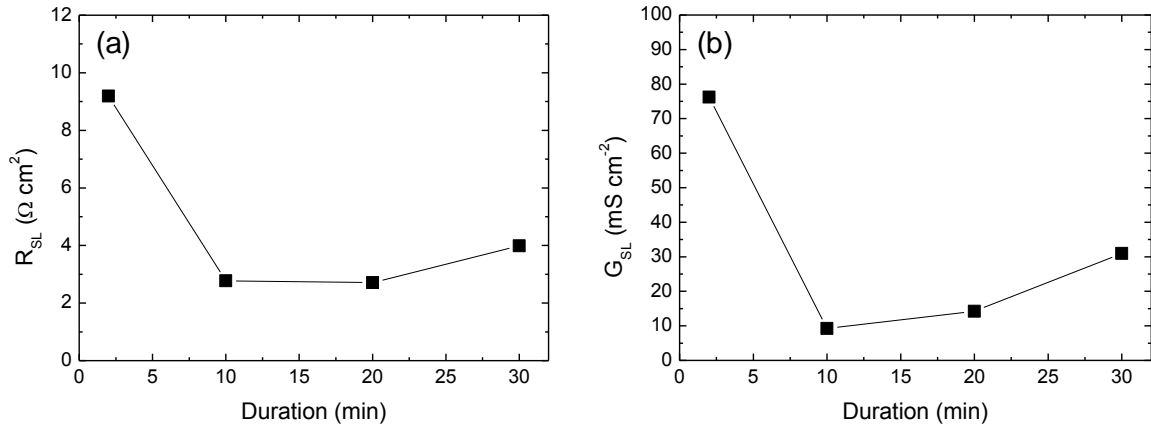

**Fig. S7** (a) Series resistance ( $R_{SL}$ ) and (b) shunt conductance ( $G_{SL}$ ) under light for the devices shown in Fig. 6(a).

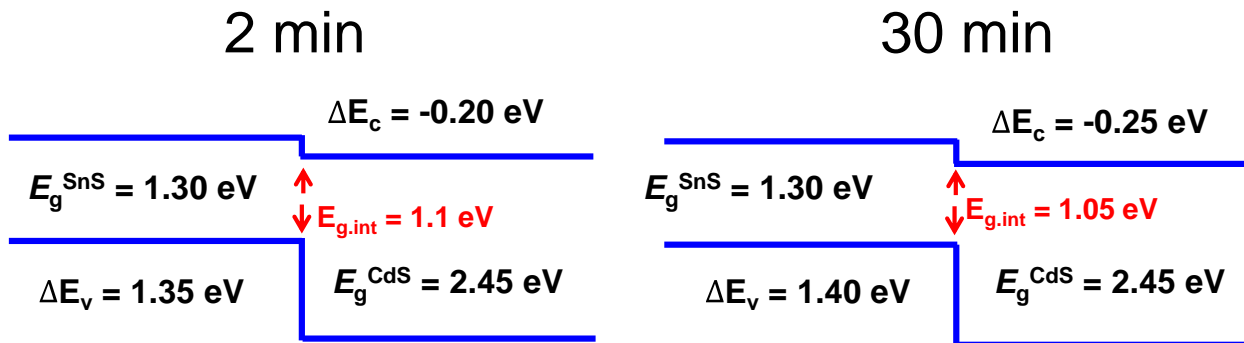

**Fig. S8** Schematic for the measured band structure of 2-min and 30-min SnS absorbers with CdS buffer using Kraut method.<sup>R2</sup>

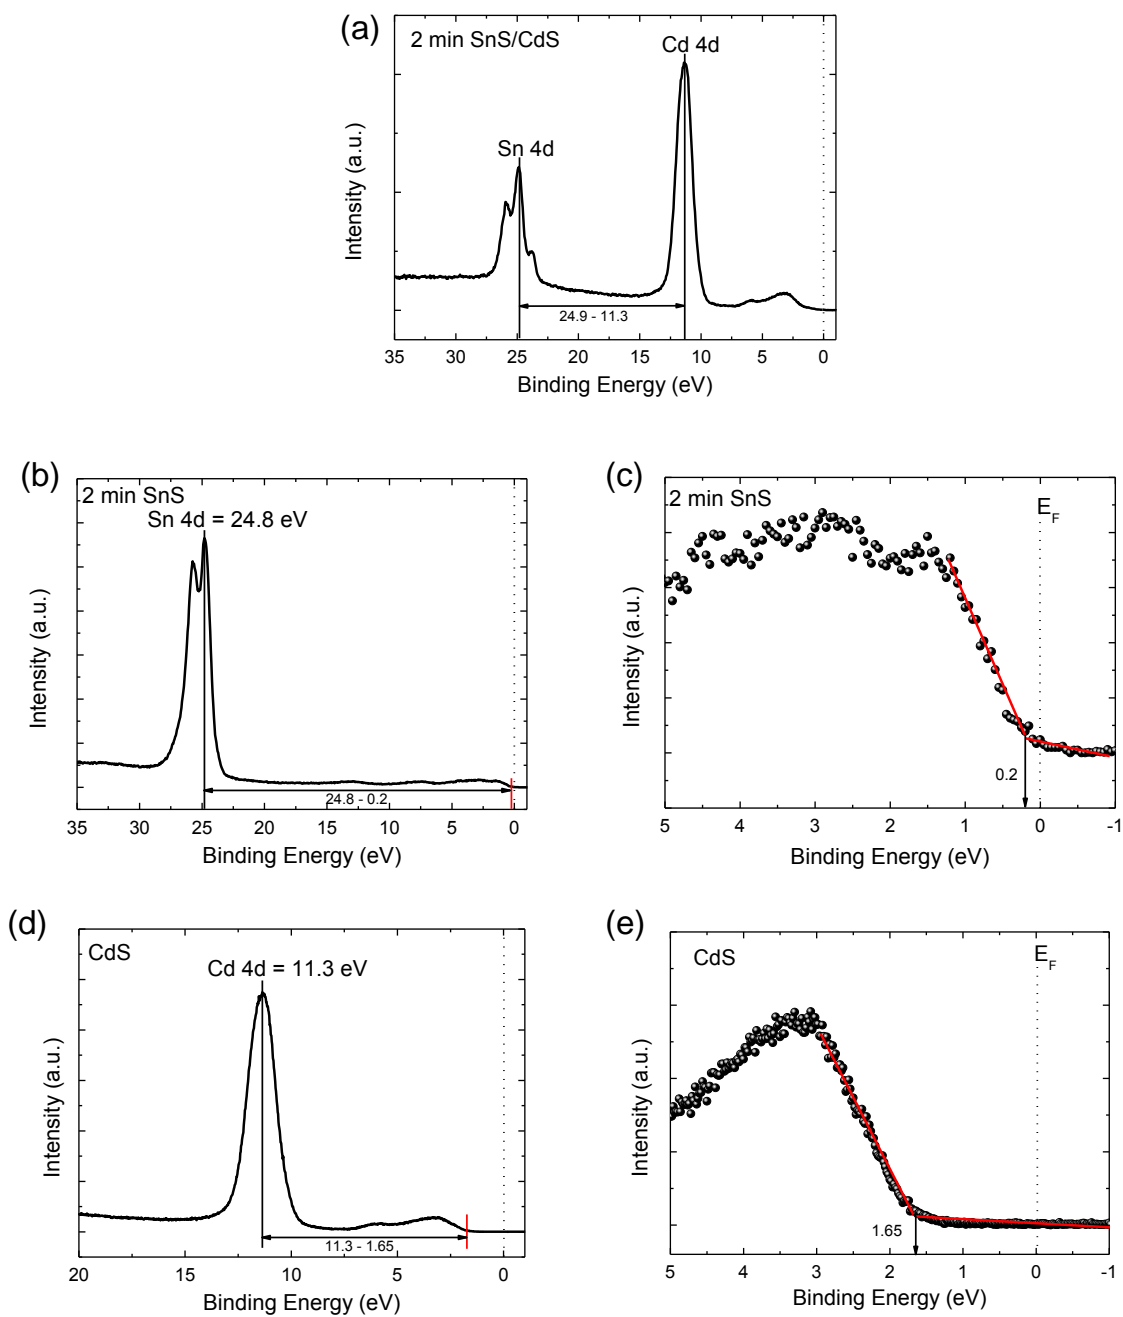

**Fig. S9** (a) XPS Sn 4d and Cd 4d peaks on etched 2-min SnS/CdS interface. (b) Sn 4d and (c) valence band on 2-min SnS sample. (d) Cd 4d and (e) valence band on CdS sample.

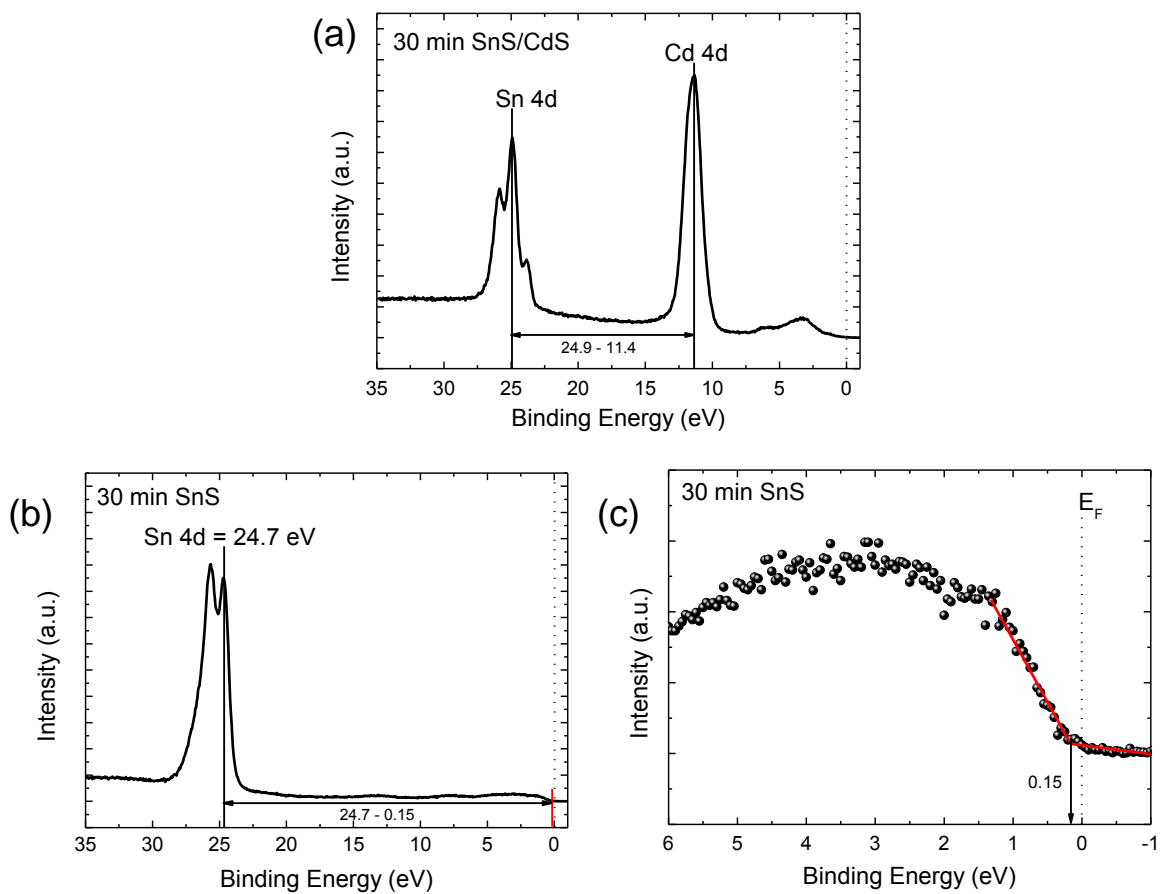

**Fig. S10** (a) XPS Sn 4d and Cd 4d peaks on etched 30-min SnS/CdS interface. (b) Sn 4d and (c) valence band on 30-min SnS sample.

**XPS measurements:** XPS measurement was performed (Kratos, AXIS-Nova Ultra DLD). The X-ray source was monochromated Al-K $\alpha$  (1486.68 eV) with binding energy calibration. Three samples were prepared: SnS grown on SLG/Mo substrate, CdS grown on FTO substrate, and SLG/Mo/SnS/CdS. In the case of SLG/Mo/SnS/CdS, depth profiling was carried out by 10 KeV Ar<sup>+</sup> ions until the Sn peak was detected. Valence band offset was calculated by using the following formula<sup>R2</sup>:

$$\Delta E_V = E_V^{SnS} - E_V^{CdS} = (E_{Sn\ 4d}^{SnS-CdS} - E_{Cd\ 4d}^{SnS-CdS}) - (E_{Sn\ 4d}^{SnS} - E_V^{SnS}) + (E_{cd\ 4d}^{CdS} - E_V^{CdS})$$

where subscription and superscription mean the detected XPS peak and the used sample, respectively.

First, the 2-min SnS/CdS band offset was calculated (see Fig. S9).  $E_{Sn\ 4d}^{SnS-CdS} - E_{Cd\ 4d}^{SnS-CdS}$  was calculated to be 13.6 eV (i.e., 24.9 eV–11.3 eV).  $E_{Sn\ 4d}^{SnS} - E_V^{SnS}$  was measured to be 24.6 eV (i.e., 24.8 eV–0.2 eV).  $E_{cd\ 4d}^{CdS} - E_V^{CdS}$  was 9.65 eV (i.e., 11.6 eV–1.65 eV). Therefore,  $\Delta E_V$  was -1.35 eV.

Finally, the conduction band offset ( $\Delta E_C$ ) was calculated using the bandgap values of SnS (1.30 eV) and CdS (2.45 eV) estimated from external quantum efficiency.

$$\Delta E_C = (E_g^{CdS} - E_g^{SnS}) + \Delta E_V$$

$\Delta E_C$  was determined to be -0.2 eV.

Second, the 30-min SnS/CdS band offset was calculated (see Fig. S10).  $E_{Sn\ 4d}^{SnS-CdS} - E_{Cd\ 4d}^{SnS-CdS}$  was calculated to be 13.5 eV (i.e., 24.9 eV–11.4 eV).  $E_{Sn\ 4d}^{SnS} - E_V^{SnS}$  was measured to be 24.55 eV (i.e., 24.7 eV–0.15 eV).  $E_{cd\ 4d}^{CdS} - E_V^{CdS}$  was 9.65 eV (i.e., 11.6 eV–1.65 eV). Therefore,  $\Delta E_V$  was -1.40 eV.

Finally, the conduction band offset ( $\Delta E_C$ ) was calculated using the bandgap values of SnS (1.30 eV) and CdS (2.45 eV) estimated from external quantum efficiency.

$$\Delta E_C = (E_g^{CdS} - E_g^{SnS}) + \Delta E_V$$

$\Delta E_C$  was determined to be -0.25 eV.



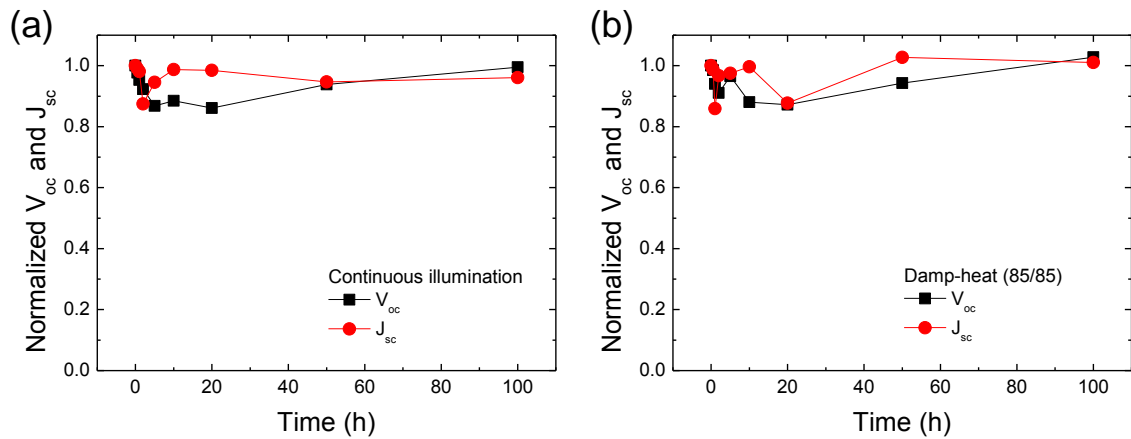

**Fig. S11** Normalized  $V_{oc}$  and  $J_{sc}$  as a function of time for (a) continuous illumination and (b) damp-heat (85/85) conditions, respectively.

**Table S1** Detailed cell parameters for TFSCs with different SnS growth duration. The cell with the highest efficiency for each sample is highlighted in bold with purple background.

| Sample  | $V_{oc}$<br>(V) | $J_{sc}$<br>(mA cm <sup>-2</sup> ) | FF           | $\eta$<br>(%) | $R_{SL}$<br>(ohm cm <sup>2</sup> ) | $G_{SL}$<br>(mS cm <sup>-2</sup> ) |
|---------|-----------------|------------------------------------|--------------|---------------|------------------------------------|------------------------------------|
| 2 min   | 0.157           | 15.7                               | 0.264        | 0.654         | 9.1                                | 96.5                               |
|         | 0.134           | 14.5                               | 0.268        | 0.521         | 8.4                                | 102.5                              |
|         | 0.124           | 14.5                               | 0.26         | 0.466         | 7.8                                | 110.3                              |
|         | 0.105           | 17.7                               | 0.256        | 0.479         | 5.5                                | 163.8                              |
|         | 0.172           | 16.2                               | 0.265        | 0.734         | 10.0                               | 85.0                               |
|         | 0.158           | 15.5                               | 0.259        | 0.634         | 10.0                               | 91.0                               |
|         | 0.100           | 15.0                               | 0.253        | 0.378         | 6.7                                | 145.0                              |
|         | 0.088           | 17.0                               | 0.254        | 0.380         | 4.6                                | 185.8                              |
|         | <b>0.207</b>    | <b>17.6</b>                        | <b>0.269</b> | <b>0.981</b>  | <b>9.2</b>                         | <b>76.3</b>                        |
|         | 0.119           | 16.7                               | 0.273        | 0.54          | 16.7                               | 118.8                              |
|         | 0.114           | 16.1                               | 0.257        | 0.473         | 6.0                                | 132.0                              |
|         | 0.142           | 17.5                               | 0.259        | 0.645         | 15.4                               | 113.0                              |
| Average | 0.135           | 16.2                               | 0.261        | 0.574         | 9.1                                | 118.3                              |
| 10 min  | 0.321           | 19.1                               | 0.531        | 3.25          | 3.1                                | 11.8                               |
|         | 0.326           | 19.7                               | 0.548        | 3.52          | 5.7                                | 10.8                               |
|         | 0.326           | 18.4                               | 0.576        | 3.46          | 3.0                                | 4.3                                |
|         | 0.328           | 19.3                               | 0.573        | 3.62          | 3.0                                | 1.8                                |
|         | 0.329           | 18.6                               | 0.53         | 3.23          | 3.1                                | 9.3                                |
|         | 0.331           | 19.0                               | 0.57         | 3.59          | 2.7                                | 8.0                                |
|         | 0.329           | 17.4                               | 0.564        | 3.22          | 3.3                                | 4.0                                |
|         | 0.332           | 18.3                               | 0.578        | 3.50          | 2.9                                | 12.0                               |
|         | 0.340           | 19.5                               | 0.564        | 3.73          | 2.9                                | 3.8                                |
|         | 0.340           | 20.0                               | 0.569        | 3.86          | 2.7                                | 6.5                                |
|         | 0.340           | 18.8                               | 0.561        | 3.57          | 2.9                                | 6.0                                |
|         | <b>0.342</b>    | <b>19.8</b>                        | <b>0.58</b>  | <b>3.93</b>   | <b>2.8</b>                         | <b>9.3</b>                         |
| Average | 0.332           | 19.0                               | 0.562        | 3.54          | 3.2                                | 7.3                                |

|         |              |             |              |             |            |             |
|---------|--------------|-------------|--------------|-------------|------------|-------------|
| 20 min  | 0.299        | 20.8        | 0.522        | 3.24        | 2.9        | 13.0        |
|         | 0.296        | 19.4        | 0.519        | 2.98        | 3.0        | 16.8        |
|         | 0.298        | 20.6        | 0.511        | 3.13        | 2.9        | 12.0        |
|         | 0.298        | 20.8        | 0.5          | 3.10        | 3.0        | 24.5        |
|         | <b>0.299</b> | <b>20.0</b> | <b>0.546</b> | <b>3.26</b> | <b>2.7</b> | <b>14.3</b> |
|         | 0.298        | 18.7        | 0.546        | 3.04        | 3.1        | 18.0        |
|         | 0.299        | 19.7        | 0.543        | 3.21        | 2.8        | 11.5        |
|         | 0.300        | 19.7        | 0.538        | 3.17        | 3.0        | 12.8        |
|         | 0.299        | 18.2        | 0.544        | 2.96        | 3.2        | 8.8         |
|         | 0.296        | 17.3        | 0.548        | 2.81        | 3.0        | 6.0         |
|         | 0.298        | 18.3        | 0.55         | 3.00        | 3.1        | 12.0        |
|         | 0.298        | 18.3        | 0.549        | 2.99        | 3.0        | 9.8         |
| Average | 0.298        | 19.3        | 0.535        | 3.07        | 3.0        | 13.3        |
| 30 min  | 0.238        | 16.5        | 0.334        | 1.31        | 6.0        | 42.0        |
|         | 0.262        | 14.5        | 0.339        | 1.28        | 7.8        | 38.5        |
|         | 0.252        | 14.8        | 0.311        | 1.16        | 8.7        | 41.0        |
|         | 0.255        | 15.5        | 0.318        | 1.26        | 8.3        | 48.3        |
|         | 0.288        | 18.2        | 0.398        | 2.08        | 4.8        | 31.3        |
|         | 0.282        | 16.5        | 0.414        | 1.93        | 5.4        | 24.5        |
|         | 0.270        | 16.7        | 0.351        | 1.58        | 6.1        | 41.0        |
|         | 0.270        | 17.2        | 0.355        | 1.65        | 5.7        | 41.5        |
|         | <b>0.287</b> | <b>18.8</b> | <b>0.429</b> | <b>2.31</b> | <b>4.0</b> | <b>31.0</b> |
|         | 0.283        | 17.7        | 0.427        | 2.14        | 4.3        | 27.5        |
|         | 0.290        | 17.5        | 0.436        | 2.21        | 4.3        | 23.8        |
| 0.288   | 17.7         | 0.421       | 2.15         | 4.5         | 28.0       |             |
| Average | 0.272        | 16.8        | 0.378        | 1.76        | 5.8        | 34.9        |

## References for ESI

- R1 T. J. Whittles, L. A. Burton, J. M. Skelton, A. Walsh, T. D. Veal and V. R. Dhanak, *Chem. Mater.*, 2016, **28**, 3718–3726.
- R2 R. E. Brandt, M. Young, H. H. Park, A. Dameron, D. Chua, Y. S. Lee, G. Teeter, R. G. Gordon and T. Buonassisi, *Appl. Phys. Lett.*, 2014, **105**, 263901.
